# Supplementary material for: The effects of grape seed proanthocyanidins in cafeteria diet-induced obese Fischer 344 rats are influenced by faecal microbiota in a photoperiod dependent manner
Source: Royal Society of Chemistry journal article supplement (doi:10.1039/d2fo01206e), 2022-01-01
Supplement: d2fo01206e1.pdf [file d2fo01206e1.pdf]

## The effects of Grape Seed Proanthocyanidins in cafeteria-induced obese rats are influenced by fecal microbiota in a photoperiod dependent manner.

Verónica Arreaza-Gil, Iván Escobar-Martínez, Begoña Muguerza, Gerard Aragonès, Manuel Suárez, Cristina Torres-Fuentes\*, Anna Arola-Arnal.

Universitat Rovira i Virgili, Departament de Bioquímica i Biotecnologia, Nutrigenomics Research Group, 43007 Tarragona, Spain. [veronica.arreaza@urv.cat](mailto:veronica.arreaza@urv.cat) (V. A-G); [ivan.escobar@urv.cat](mailto:ivan.escobar@urv.cat) (I. E-M); [begona.muguerza@urv.cat](mailto:begona.muguerza@urv.cat) (B.M.); [gerard.aragones@urv.cat](mailto:gerard.aragones@urv.cat) (G.A.); [manuel.suarez@urv.cat](mailto:manuel.suarez@urv.cat) (M.S); [anna.arola@urv.cat](mailto:anna.arola@urv.cat) (A. A-A).

\*Corresponding author: [cristina.torres@urv.cat](mailto:cristina.torres@urv.cat) (C. T-F)

### Supplementary Material

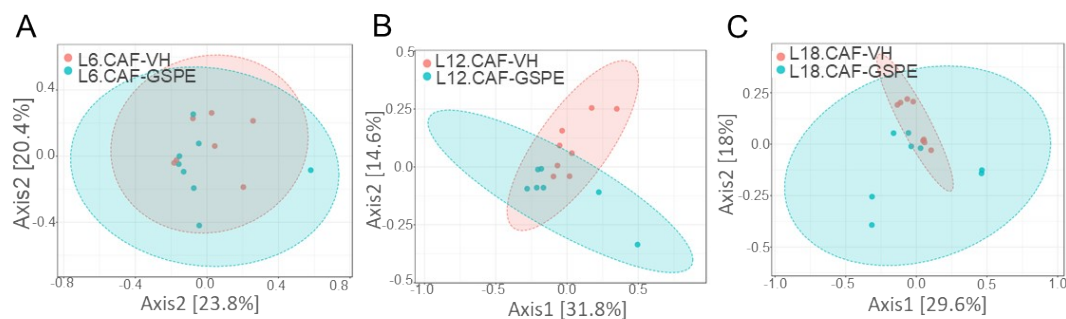

**Fig. S1.** GSPE effects on  $\beta$ -diversity. (A to B):  $\beta$ -diversity based on Bray-Curtis distances and visualized by a Principal Coordinates Analysis (PCoA) 3D plot (PERMANOVA,  $p < 0.001$ ) in GSPE-treated rats under (A) L6; (B) L12; and (C) L18 conditions. ( $n=7-8$ ); L6: 6h light/18h darkness; L12: 12h light/12h darkness; L18: 18h light/6h darkness; CAF: cafeteria diet; VH: vehicle; GSPE: grape seed proanthocyanidin extract;
