# Supplementary material for: The effects of grape seed proanthocyanidins in cafeteria diet-induced obese Fischer 344 rats are influenced by faecal microbiota in a photoperiod dependent manner
Source: Royal Society of Chemistry journal article supplement (doi:10.1039/d2fo01206e), 2022-01-01
Supplement: d2fo01206e2.xlsx [file d2fo01206e2.xlsx]

## Sheet: TableS1
	Table S1. Percentage of the relative abundance of GSPE- and GSPE+ABX-treated rats and their respective controls under short, standard and long photoperiod conditions at the different taxonomic levels.
		Ph	CAF-VH	P-value Ph1	CAF-GSPE	P-value Ph1	CAF-ABX	P-value Ph1	CAF-ABX+GSPE	P-value Ph1	P-value Group2	P-value3
			Median(Q1-Q3)4		Median(Q1-Q3)4		Median(Q1-Q3)4		Median(Q1-Q3)4			VH vs GSPE	ABX vs GSPE
	Phylum
	Actinobacteria	L6	0.08(0.04-0.18)	0.321	0.13(0.07-1.04)	0.111	2.82E-04(0-3.30E-04)#	0.801	1.17E-04(0-3.49E-04)# a	0.004	3.48773e-05	0.164915	0.583581
		L12	0.05(0.05-0.06)		0.04(0.04-0.15)		3.19E-04(0-8.09E-04)#		3.22E-04(6.05E-05-4.45E-04)# ab		3.48773e-05	0.417887	0.83117
		L18	0.06(0.03-0.06)		0.14(0.04-0.47)		4.47E-04(0-6.47E-04)		0.002(0.001-0.003) b $		2.64602e-05	0.24716	0.0085138
	Bacteroidetes	L6	52.24(44.61-70.78)	0.084	50.44(44.02-61.95)	0.61	76.78(58.04-80.46)#	0.176	72.46(60.01-78.37)#	0.41	0.0122214	0.354539	0.59951
		L12	53.86(46.92-61.94)		55.71(38.91-81.32)		59.72(35.89-76.41)		71.04(63.72-75.88)		0.107451	0.643429	0.0928919
		L18	69.27(54.76-76.93)		52.97(46.68-78.57)		63.56(32.54-72.08)		66.55(55.82-68.73)		0.42723	0.293622	0.475051
	Cyanobacteria	L6	0.51(0.17-0.97)	0.538	0.41(0.13-0.59)	0.738	0.001(5.65E-04-0.009)#	0.664	1.84E-04(0-0.002)#	0.045	0.000134092	0.487453	0.109819
		L12	0.30(0.23-0.42)		0.22(0.08-0.50)		0.003(6.70E-04-0.01)#		7.40E-04(6.45E-05-0.001)#		0	0.562834	0.131079
		L18	0.41(0.30-0.57)		0.38(0.05-1.55)		0.001(8.95E-04-0.002)#		0.002(0.001-0.003)#		0.000276839	0.59951	0.14172
	Firmicutes	L6	42.02(23.69-49.75)	0.072	38.17(33.76-47.92)	0.769	7.68(3.74-9.28)#	0.27	1.11(0.51-1.93)# a $	0.015	1.35345e-05	0.643429	0.00162919
		L12	40.02(32.87-48.83)		32.07(15.04-52.25)		4.43(2.44-6.61)#		2.50(1.77-3.95)# ab		4.07222e-05	0.487453	0.247996
		L18	24.51(18.53-37.85)		39.09(13.63-46.36)		7.60(2.92-15.66)#		4.20(3.61-5.32)# b		0.00108357	0.400814	0.277439
	Proteobacteria	L6	3.02(2.22-3.71)	0.418	3.72(2.14-7.14)	0.449	13.77(10.11-31.59)#	0.135	22.64(17.84-35.39)#	0.537	2.9718e-05	0.417887	0.0587074
		L12	3.26(1.89-3.98)		2.83(2.30-5.16)		27.04(17.49-58.26)#		20.80(16.05-25.96)#		4.24682e-05	0.728454	0.247996
		L18	4.23(2.06-5.26)		4.65(3.12-6.30)		22.14(16.12-60.41)#		26.58(17.02-38.82)#		6.71452e-05	0.344562	0.94906
	Tenericutes	L6	7.66E-04(2.64E-04-0.009)	0.846	6.09E-04(6.98E-05-0.02)	0.48	0.48(2.91E-04-2.60)#	0.193	0.05(0.00-0.79)#	0.495	0.424223	0.728221	0.368485
		L12	0.001(6.53E-05-0.003)		6.16E-04(0-0.04)		0.006(0.002-7.19)		0.07(7.24E-04-0.29)		0.202856	0.907038	0.674424
		L18	7.92E-04(3.27E-04-0.002)		0.003(6.23E-04-0.08)		8.46E-04(5.55E-04-9.70E-04)		0.3011(0.0025-2.8275)		0.0781177	0.115184	0.0733216
	Verrucomicrobia	L6	1.92(1.23-2.26)	0.722	1.23(0.43-2.76)	0.974	1.97(0.32-3.96)#	0.583	2.96(1.50-5.32)#	0.543	0.282319	0.24716	0.344562
		L12	1.63(0.71-3.76)		0.95(0.60-1.46)		0.54(0.01-3.60)		3.00(0.12-7.56)		0.549539	0.24716	0.344562
		L18	1.13(0.92-1.83)		1.02(0.42-2.11)		0.022(0.005-6.840)		0.016(0.009-10.641)		0.571929	0.528612	0.848006
	Class
	Actinobacteria	L6	0.01(0-0.05)	0.413	0.08(0.01-0.65) a	0.048	2.82E-04(0-3.30E-04)#	0.889	9.80E-05(0-3.34E-04)# a	0.005	3.49799e-05	0.0825793	0.510671
	Actinobacteria	L12	0.01(0-0.01)		0(0-0.01) b		1.62E-04(0-8.09E-04)#		2.66E-04(5.72E-05-3.95E-04)# a		5.59078e-05	0.907869	0.746318
	Actinobacteria	L18	0(0-0.01)		0.03(0.01-0.26) ab		4.47E-04(0-6.47E-04)#		0(4.44E-04-0)# $ b		0.000134105	0.0208626	0.0466702
	Coriobacteriia	L6	0.04(0.03-0.06)	0.762	0.08(0.04-0.2)	0.537	0(0-0)#	0.631	0(0-0)#	0.069	1.34474e-05	0.164915	0.927264
	Coriobacteriia	L12	0.05(0.04-0.06)		0.04(0.03-0.04)		0(0-0)#		0(0-1.72E-04)#		2.06211e-05	0.562834	0.643954
	Coriobacteriia	L18	0.05(0.03-0.05)		0.05(0.02-0.11)		0(0-0)#		3.79E-04(0-8.88E-04)# $		3.43458e-05	0.59951	0.0250462
	Bacteroidia	L6	52.24(44.61-70.78)	0.084	50.44(44.02-59.37)	0.61	76.76(58.02-80.46)	0.176	72.45(60-78.35)	0.219	0.0122214	0.354539	0.59951
	Bacteroidia	L12	53.86(46.92-61.94)		55.71(38.91-81.32)		59.72(35.89-76.4)		71.03(63.72-75.87)		0.107451	0.643429	0.0928919
	Bacteroidia	L18	69.27(54.76-76.93)		52.97(46.68-78.56)		63.56(32.51-72.07)		66.55(55.82-68.68)		0.541496	0.293622	0.749394
	Flavobacteriia	L6	0(0-0)	0.887	0(0-2.29E-04)	0.745	0(0-0)	0.15	0(0-0)	0.072	0.28027	0.740727	0.0645
	Flavobacteriia	L12	0(0-0)		0(0-0)		0(0-0)		0(0-0)		0.999777	1	0.927264
	Flavobacteriia	L18	0(0-1.62E-04)		0(0-0)		0(0-0)		0(0-7.10E-04)		0.309012	0.782595	0.0619234
	Sphingobacteriia	L6	0(0-0)	0.25	0(0-0)	0.112	0.01(0.01-0.02)#	0.291	0.01(0.01-0.01)#	0.061	1.62065e-05	0.349575	0.59951
	Sphingobacteriia	L12	0(0-1.67E-04)		2.26E-04(0-2.78E-04)		0(5.67E-05-0.01)#		0(0-0.01)#		0.00138533	0.102719	0.916298
	Sphingobacteriia	L18	0(0-2.15E-04)		2.95E-04(0-0)		0.01(0-0.03)#		0(0-0.02)#		0.0425045	0.103826	0.477322
	Bacilli	L6	0.75(0.55-1.54)	0.09	1.64(0.43-3.62)	0.521	0.9(0.21-1.48)#	0.566	0.03(0.01-0.57)#	0.23	0.0314657	0.728454	0.0587074
	Bacilli	L12	2.41(1.23-3.97)		0.95(0.78-1.27)$		0.31(0.03-2.01)#		0.39(0.01-1.53)#		0.0276462	0.0150873	0.59951
	Bacilli	L18	0.71(0.22-2.38)		2.17(0.61-2.98)		0.23(0.03-4.96)		0.36(0.11-2.18)		0.431027	0.344562	0.654721
	Clostridia	L6	41.45(22.84-45.36) ab	0.049	35.95(32.61-42.12)	0.626	6.88(2.15-8.94)#	0.426	0.55(0.34-1.35)# $	0.044	1.64044e-05	0.907869	0.0032759
	Clostridia	L12	36.98(30.67-44.22) a		29.13(13.97-40.96)		2.79(1.19-5.58)#		2.2(1.14-2.67)#		4.19824e-05	0.487453	0.293622
	Clostridia	L18	23.94(17.64-29.23) b		35.17(12.16-42.86)		2.8(1.6-15.42)#		3.2(2.03-4.12)#		0.000550076	0.207578	0.654721
	Erysipelotrichi	L6	0.21(0.1-1.4)	0.153	0.65(0.22-1.49)	0.516	0.01(0-0.28)#	0.499	5.35E-04(7.35E-05-0.01)#	0.116	0.000451694	0.297621	0.393769
	Erysipelotrichi	L12	0.85(0.35-1.09)		0.28(0.21-0.67)		0(0-0.22)#		0.01(8.29E-04-0.19)#		0.00101935	0.164915	0.833635
	Erysipelotrichi	L18	0.37(0.13-0.52)		0.97(0.17-1.17)		0(2.78E-04-0.09)#		8.79E-04(0-0)#		0.000165331	0.207578	0.653293
	Alphaproteobacteria	L6	0.48(0.14-0.7)	0.255	0.28(0.12-0.34)	0.138	0.01(0-0.01)#	0.27	8.77E-04(3.39E-04-0)# $ a	0.037	3.14211e-05	0.24716	0.00232209
	Alphaproteobacteria	L12	0.22(0.16-0.34)		0.16(0.11-0.82)		0(0-0.01)#		0(8.27E-04-0)# ab		3.99196e-05	0.816961	0.172167
	Alphaproteobacteria	L18	0.56(0.19-1.08)		0.07(0.01-0.25)		0(0-0.01)#		0(0-0.01)# b		0.000735454	0.0459994	0.654721
	Betaproteobacteria	L6	1.05(0.89-1.59)	0.976	1.83(0.8-5.33)	0.881	1.96(1.48-3.76)	0.065	3.63(2.91-4.25)	0.297	0.0525339	0.354539	0.0928919
	Betaproteobacteria	L12	1.1(0.74-2.39)		1.33(0.69-2.51)		3.14(1.59-4.55)#		3.16(2.62-4.26)#		0.0155272	1	0.752714
	Betaproteobacteria	L18	1.24(0.5-2.55)		1.65(0.83-3.34)		5.11(2.96-7.82)#		5.27(2.6-5.71)#		0.00155145	0.400814	0.749394
	Deltaproteobacteria	L6	0.64(0.43-1.19)	0.586	0.78(0.23-1.47)	0.47	0.63(0.07-0.78)	0.92	0.12(0.07-0.53)	0.064	0.0678296	0.907869	0.141482
	Deltaproteobacteria	L12	0.76(0.32-1.54)		0.72(0.31-1.52)		0.47(0.12-1.39)		0.49(0.32-0.84)		0.745616	0.907869	0.916359
	Deltaproteobacteria	L18	1.18(0.44-1.83)		1(0.62-1.34)		0.63(0.01-1.16)		0.31(0.26-0.87)		0.0864304	0.59951	0.749394
	Mollicutes	L6	5.90E-04(2.64E-04-0.01)	0.871	6.09E-04(6.98E-05-0.02)	0.388	0.48(2.91E-04-2.6)	0.161	0.05(0-0.79)	0.495	0.423398	0.907786	0.368485
	Mollicutes	L12	5.80E-04(6.53E-05-0)		6.16E-04(0-0)		0.01(0-7.19)		0.07(6.63E-04-0.29)		0.099735	0.726095	0.674424
	Mollicutes	L18	6.75E-04(3.27E-04-0)		0(6.23E-04-0.02)		8.46E-04(2.78E-04-9.70E-04)		0.3(0-2.83)		0.0650586	0.115184	0.0733216
	Verrucomicrobiae	L6	1.92(1.23-2.26)	0.722	1.23(0.43-2.75)	0.974	1.97(0.32-3.96)	0.583	2.96(1.5-5.32)	0.543	0.282319	0.24716	0.344562
	Verrucomicrobiae	L12	1.63(0.71-3.76)		0.95(0.6-1.28)		0.54(0.01-3.6)		3(0.12-7.56)		0.549539	0.24716	0.344562
	Verrucomicrobiae	L18	1.13(0.92-1.83)		1.02(0.42-2.11)		0.02(0-6.84)		0.02(0.01-10.64)		0.571929	0.528612	0.848006
	Order
	Actinomycetales	L6	2.48E-03(1.80E-03-3.76E-03)	0.805396	3.75E-03(2.80E-03-4.62E-03)	0.489987	0(0-2.01E-04)#	0.789786	0(0-0)#	0.173427	5.5226e-05	0.104571	0.643954
		L12	3.54E-03(1.31E-03-3.68E-03)		1.75E-03(1.53E-03-6.78E-03)	0.489987	0(0-0)#	0.789786	2.51E-04(5.72E-05-3.38E-04)# $	0.173427	3.00117e-05	0.562834	0.0491408
		L18	2.13E-03(1.18E-03-3.55E-03)		5.15E-03(1.50E-03-0.06)	0.489987	0(0-3.23E-04)#	0.789786	0(0-8.79E-04)#	0.173427	0.000480655	0.172167	0.412777
	Bifidobacteriales	L6	4.42E-03(5.27E-04-0.03)	0.527628	0.08(5.05E-03-0.65)	0.0754974	1.48E-04(0-3.30E-04)#	0.902519	0(0-2.25E-04)# a	0.00106978	3.58542e-05	0.105193	0.417887
	Bifidobacteriales	L12	4.17E-03(1.12E-03-6.54E-03)	0.527628	2.78E-03(3.82E-04-0.02)	0.0754974	0(0-3.48E-04)#	0.902519	0(0-0)# a	0.00106978	0.000297982	0.816961	0.369825
	Bifidobacteriales	L18	1.65E-03(5.12E-04-0.01)	0.527628	0.02(4.28E-03-0.3)$	0.0754974	2.80E-04(0-4.47E-04)#	0.902519	8.18E-04(4.44E-04-2.54E-03)# $ b	0.00106978	0.000539842	0.0356919	0.012327
	Coriobacteriales	L6	0.04(0.03-0.09)	0.762053	0.08(0.04-0.2)	0.536614	0(0-0)#	0.63114	0(0-0)#	0.0687392	1.34474e-05	0.164915	0.927264
	Coriobacteriales	L12	0.05(0.03-0.06)	0.762053	0.04(0.03-0.09)	0.536614	0(0-0)#	0.63114	0(0-1.72E-04)#	0.0687392	2.06211e-05	0.562834	0.643954
	Coriobacteriales	L18	0.05(0.03-0.05)	0.762053	0.05(0.02-0.18)	0.536614	0(0-0)#	0.63114	3.79E-04(0-8.88E-04)# $	0.0687392	3.43458e-05	0.59951	0.0250462
	Bacteroidales	L6	52.24(44.61-72.07)	0.0839704	50.44(44.02-61.95)	0.609599	76.76(58.02-80.46)#	0.176254	72.45(60-78.35)#	0.218756	0.0122214	0.354539	0.59951
	Bacteroidales	L12	56.3(50.77-62.99)	0.0839704	55.71(38.91-81.32)	0.609599	59.72(35.89-76.4)	0.176254	71.03(63.72-75.87)	0.218756	0.107451	0.643429	0.0928919
	Bacteroidales	L18	67.68(52.56-77.02)	0.0839704	52.97(46.68-78.56)	0.609599	63.56(32.51-72.07)	0.176254	66.55(55.82-68.68)	0.218756	0.541496	0.293622	0.749394
	YS2	L6	0.51(0.17-1.03)	0.537761	0.41(0.13-0.59)	0.780617	1.70E-04(0-7.96E-03)#	0.361695	0(0-3.52E-04)# a	0.0137362	0.000161958	0.562834	0.487453
	YS2	L12	0.3(0.22-0.45)	0.537761	0.22(0.08-0.5)	0.780617	2.48E-03(3.58E-04-9.38E-03)#	0.361695	0(0-7.80E-04)# $ a	0.0137362	0.00043729	0.562834	0.0270655
	YS2	L18	0.44(0.3-0.58)	0.537761	0.38(0.05-1.55)	0.780617	5.55E-04(2.82E-04-1.08E-03)#	0.361695	1.64E-03(8.88E-04-2.64E-03)# b	0.0137362	0.000314357	0.59951	0.0845335
	Bacillales	L6	5.27E-04(4.14E-04-1.27E-03)a	0.0297119	3.39E-03(1.31E-03-0.03)$ a	0.0150288	7.59E-04(5.53E-04-1.14E-03)	0.0639942	2.02E-04(0-3.56E-04)# $	0.132341	0.00100519	0.00547855	0.0261822
	Bacillales	L12	6.37E-04(0-2.18E-03)a	0.0297119	8.65E-04(1.91E-04-1.11E-03) b	0.0150288	1.13E-04(0-4.29E-04)	0.0639942	3.81E-04(7.76E-05-1.84E-03)	0.132341	0.529343	1	0.3318
	Bacillales	L18	2.84E-03(1.19E-03-3.07E-03)b	0.0297119	1.72E-03(5.54E-04-2.98E-03) ab	0.0150288	8.46E-04(2.78E-04-3.64E-03)	0.0639942	1.89E-03(0-4.71E-03)	0.132341	0.859199	0.400814	0.748323
	Lactobacillales	L6	0.75(0.55-1.78)	0.0897686	1.64(0.4-3.62)	0.515781	0.77(0.21-1.48)	0.586274	0.03(6.42E-03-0.57)#	0.229544	0.0314657	0.728454	0.0587074
	Lactobacillales	L12	2.39(1.13-4.38)	0.0897686	0.95(0.77-1.27)	0.515781	0.31(0.03-2.01)#	0.586274	0.39(0.01-1.53)#	0.229544	0.0276462	0.0150873	0.59951
	Lactobacillales	L18	0.67(0.2-2.44)	0.0897686	2.17(0.61-3.49)	0.515781	0.23(0.03-4.96)	0.586274	0.36(0.1-2.18)	0.229544	0.441914	0.400814	0.654721
	Clostridiales	L6	41.45(22.84-47.86)a	0.049498	35.94(32.61-42.12)	0.625784	6.88(2.15-8.94)#	0.426437	0.55(0.34-1.35)# $ a	0.0435718	1.64044e-05	0.907869	0.0032759
	Clostridiales	L12	34.62(30.25-44.44)a	0.049498	29.13(13.97-50.43)	0.625784	2.79(1.19-5.58)#	0.426437	2.2(1.14-2.67)# ab	0.0435718	4.19824e-05	0.487453	0.293622
	Clostridiales	L18	25.57(19.07-29.34)b	0.049498	35.17(12.16-42.86)	0.625784	2.8(1.6-15.42)#	0.426437	3.2(2.03-4.12)# b	0.0435718	0.000550076	0.207578	0.654721
	Erysipelotrichales	L6	0.21(0.1-1.5)	0.153355	0.65(0.22-1.49)	0.515781	0.01(0-0.28)#	0.498705	5.35E-04(7.35E-05-0.01)#	0.115919	0.000451694	0.297621	0.393769
	Erysipelotrichales	L12	0.8(0.27-1.13)	0.153355	0.28(0.21-0.72)	0.515781	2.81E-03(1.90E-03-0.22)#	0.498705	0.01(8.29E-04-0.19)#	0.115919	0.00101935	0.164915	0.833635
	Erysipelotrichales	L18	0.4(0.11-0.53)	0.153355	0.97(0.17-1.17)	0.515781	1.08E-03(2.78E-04-0.09)#	0.498705	8.79E-04(0-2.90E-03)#	0.115919	0.000165331	0.207578	0.653293
	RF32	L6	0.47(0.14-0.97)	0.255256	0.21(0.11-0.34)	0.14743	2.92E-04(0-3.36E-04)#	0.302662	0(0-4.41E-04)# a	0.000991539	3.77947e-05	0.203017	0.40016
	RF32	L12	0.19(0.16-0.25)	0.255256	0.16(0.11-2.06)	0.14743	9.06E-04(2.01E-04-1.38E-03)#	0.302662	0(0-0)# $ a	0.000991539	1.77484e-05	0.816961	0.00777396
	RF32	L18	0.46(0.16-1.11)	0.255256	0.07(0.01-0.25) $	0.14743	3.59E-04(0-1.69E-03)#	0.302662	8.88E-04(6.19E-04-2.84E-03)# b	0.000991539	0.000236776	0.0459994	0.109832
	Rhizobiales	L6	1.05E-03(2.95E-04-1.46E-03)a	0.0137965	1.83E-03(0-0.05)	0.0553455	1.60E-03(5.66E-04-4.78E-03)# a	0.0141146	0(0-2.94E-04)* # $	0.0755822	0.0321644	0.813664	0.00253345
	Rhizobiales	L12	0(0-0)b	0.0137965	0(0-0)	0.0553455	0(0-3.48E-04) b	0.0141146	2.51E-04(0-4.32E-04)	0.0755822	0.067368	0.349575	0.537249
	Rhizobiales	L18	5.07E-04(0-1.70E-03)a	0.0137965	4.65E-04(0-2.02E-03)	0.0553455	6.47E-04(5.64E-04-8.95E-04) ab	0.0141146	1.09E-03(0-2.84E-03)	0.0755822	0.883963	0.957461	0.563579
	Rhodospirillales	L6	2.55E-04(0-4.19E-04)	0.389206	2.92E-04(0-1.10E-03)	0.63897	3.21E-03(1.42E-03-6.67E-03)#	0.656667	2.88E-04(5.87E-05-1.78E-03)# $	0.424154	0.00586614	0.590679	0.0207687
	Rhodospirillales	L12	0(0-2.75E-04)	0.389206	0(0-5.04E-04)	0.63897	1.82E-03(4.41E-04-4.53E-03)#	0.656667	1.50E-03(5.88E-04-2.61E-03)#	0.424154	0.00226307	0.408369	0.874735
	Rhodospirillales	L18	0(0-6.38E-04)	0.389206	0(0-3.79E-04)	0.63897	1.41E-03(7.18E-04-0.01)#	0.656667	7.58E-04(0-1.64E-03)#	0.424154	0.00886649	0.951886	0.275319
	Rickettsiales	L6	3.32E-04(0-4.68E-04)	0.683378	0(0-8.26E-04)	0.424728	0(0-0)#	0.145577	0(0-1.47E-04)	0.364978	0.029935	0.464214	0.144127
	Rickettsiales	L12	2.42E-04(0-4.46E-04)	0.683378	0(0-2.88E-04)	0.424728	0(0-2.01E-04)	0.145577	0(0-1.72E-04)	0.364978	0.183742	0.231998	0.890265
	Rickettsiales	L18	2.44E-04(0-4.73E-04)	0.683378	0(0-0)	0.424728	0(0-2.82E-04)	0.145577	0(0-0)	0.364978	0.110444	0.125458	0.0619234
	Burkholderiales	L6	1.05(0.89-2.18)	0.97584	1.83(0.8-5.31)	0.881299	1.96(1.48-3.76)	0.0651935	3.63(2.91-4.25)	0.297153	0.0516873	0.354539	0.0928919
	Burkholderiales	L12	0.91(0.71-2.74)	0.97584	1.33(0.69-2.51)	0.881299	3.14(1.59-4.54)#	0.0651935	3.16(2.62-4.26)#	0.297153	0.0155272	1	0.752714
	Burkholderiales	L18	1.21(0.44-2.64)	0.97584	1.65(0.83-3.34)	0.881299	5.11(2.96-7.82)#	0.0651935	5.27(2.6-5.71)#	0.297153	0.00155145	0.400814	0.749394
	Aeromonadales	L6	0(0-0)	0.140826	0(0-0)	0.197135	5.65E-04(2.91E-04-1.51E-03)# a	0.00406936	1.35E-03(6.63E-04-2.13E-03)#	0.153534	0.000285336	0.349575	0.0928919
	Aeromonadales	L12	0(0-0)	0.140826	0(0-0)	0.197135	3.71E-03(2.10E-03-5.55E-03)# b	0.00406936	6.94E-04(3.83E-04-1.62E-03)# $	0.153534	4.63723e-06	1	0.00865154
	Aeromonadales	L18	0(0-2.16E-04)	0.140826	0(0-2.71E-04)	0.197135	0.01(1.69E-03-0.02)# b	0.00406936	1.89E-03(8.18E-04-2.47E-03)#	0.153534	2.844e-05	0.443598	0.0639193
	Enterobacteriales	L6	0.15(0.03-0.31)	0.361439	0.22(0.07-0.68)	0.0621176	10.67(6.5-22.7)#	0.237659	18.6(13.01-27.69)#	0.597301	3.19968e-05	0.203017	0.141482
	Enterobacteriales	L12	0.37(0.07-0.43)	0.361439	0.15(0.07-0.22)	0.0621176	23.03(14.61-48.04)#	0.237659	15.55(11-21.02)#	0.597301	3.83853e-05	0.816961	0.141482
	Enterobacteriales	L18	0.13(0.06-0.73)	0.361439	0.73(0.27-2.36)	0.0621176	14.76(12.08-50.64)#	0.237659	19.75(11.76-30.82)# $	0.597301	4.33923e-05	0.0459994	0.848006
	Pasteurellales	L6	7.66E-03(5.60E-03-0.02)	0.523548	7.21E-03(4.20E-03-0.03)	0.652578	0(0-0)#	1	0(0-0)#	0.140826	9.1831e-06	0.907869	1
	Pasteurellales	L12	8.63E-03(4.12E-03-0.01)	0.523548	9.04E-03(3.82E-03-0.06)	0.652578	0(0-0)#	1	0(0-2.81E-04)#	0.140826	1.46158e-05	0.487453	0.144127
	Pasteurellales	L18	0.03(4.14E-03-0.03)	0.523548	0.03(8.06E-03-0.07)	0.652578	0(0-0)#	1	0(0-0)#	0.140826	2.05148e-05	0.344562	1
	Pseudomonadales	L6	7.63E-03(2.69E-03-0.01)	0.834032	0.01(2.70E-03-0.02) ab	0.0341186	0.67(0.52-2.15)#	0.169312	0.62(0.25-1.66)#	0.0754974	4.58677e-05	0.354539	0.752714
	Pseudomonadales	L12	0.04(2.18E-03-0.05)	0.834032	3.75E-03(9.54E-04-0.01) a	0.0341186	1.61(0.7-2.35)#	0.169312	0.84(0.29-1.68)#	0.0754974	4.41056e-05	0.354539	0.528612
	Pseudomonadales	L18	8.53E-03(3.44E-03-0.03)	0.834032	0.03(0.01-0.28) b	0.0341186	1.43(0.85-3.2)#	0.169312	1.8(0.91-2.08)#	0.0754974	9.5546e-05	0.0928919	0.94906
	Vibrionales	L6	0(0-0)	0.358229	3.09E-04(0-6.20E-04)$	0.546787	0.04(8.40E-03-0.08)# a	0.0143364	0.1(0.05-0.15)#	0.057533	1.54066e-05	0.0158912	0.115184
	Vibrionales	L12	0(0-6.69E-04)	0.358229	0(0-2.52E-04)	0.546787	0.11(0.07-0.26)# b	0.0143364	0.05(0.02-0.12)#	0.057533	2.0001e-05	0.881931	0.0742034
	Vibrionales	L18	0(0-2.37E-04)	0.358229	1.19E-04(0-1.02E-03)	0.546787	0.01(6.71E-03-0.07)# a	0.0143364	0.02(5.71E-03-0.05)#	0.057533	4.1711e-05	0.184358	0.749394
	Xanthomonadales	L6	0(0-0)	0.391606	1.13E-04(0-1.39E-03)$ a	0.0136641	2.85E-04(0-1.63E-03)#	0.112493	0(0-0)* # $	1	0.0102708	0.0375889	0.0106564
	Xanthomonadales	L12	0(0-0)	0.391606	0(0-0) b	0.0136641	0(0-0)	0.112493	0(0-0)	1	0.411302	1	0.317311
	Xanthomonadales	L18	0(0-0)	0.391606	0(0-0) b	0.0136641	0(0-2.80E-04)	0.112493	0(0-0)	1	0.213532	0.317311	0.142213
	Anaeroplasmatales	L6	2.64E-04(0-2.37E-03)	0.150526	1.27E-04(0-4.10E-04) a	0.0137371	0.48(7.39E-05-2.6)	0.163823	0.05(0-0.79)	0.533005	0.158564	0.473289	0.455545
	Anaeroplasmatales	L12	2.42E-04(0-4.25E-04)	0.150526	6.16E-04(0-1.15E-03) ab	0.0137371	4.52E-03(1.81E-03-7.19)#	0.163823	0.07(4.88E-04-0.29)#	0.533005	0.00596941	0.188593	0.674424
	Anaeroplasmatales	L18	5.12E-04(2.65E-04-9.45E-04)	0.150526	1.59E-03(5.54E-04-4.66E-03) a	0.0137371	3.23E-04(2.78E-04-8.95E-04)#	0.163823	0.3(2.47E-03-2.83)#	0.533005	0.0362132	0.141482	0.0733216
	Verrucomicrobiales	L6	1.92(1.23-2.93)	0.722443	1.23(0.43-2.76)	0.974137	1.97(0.32-3.96)	0.582984	2.96(1.5-5.32)	0.542584	0.282319	0.24716	0.344562
	Verrucomicrobiales	L12	1.79(0.73-4.35)	0.722443	0.95(0.6-1.46)	0.974137	0.54(0.01-3.6)	0.582984	3(0.12-7.56)	0.542584	0.549539	0.24716	0.344562
	Verrucomicrobiales	L18	1.31(0.95-1.95)	0.722443	1.02(0.42-2.11)	0.974137	0.02(5.00E-03-6.84)	0.582984	0.02(8.52E-03-10.64)	0.542584	0.571929	0.528612	0.848006
	Family
	Corynebacteriaceae	L6	0(0-0)	0.195558	2.69E-04(0-6.49E-04)	0.933673	0(0-0)	1	0(0-0)	0.63114	0.0199835	0.0896481	0.317311
	Corynebacteriaceae	L12	0(0-6.13E-05)	0.195558	4.52E-04(0-5.02E-04)	0.933673	0(0-0)	1	0(0-0)	0.63114	0.0392362	0.346484	0.317311
	Corynebacteriaceae	L18	3.35E-04(0-5.15E-04)	0.195558	1.44E-04(0-3.57E-04)	0.933673	0(0-0)	1	0(0-0)	0.63114	0.0142161	0.826444	1
	Microbacteriaceae	L6	0(0-0)	0.149924	0(0-0)	1	0(0-0)	1	0(0-0)	1	1	1	1
	Microbacteriaceae	L12	0(0-2.31E-04)	0.149924	0(0-0)	1	0(0-0)	1	0(0-0)	1	0.0265918	0.0823555	1
	Microbacteriaceae	L18	0(0-0)	0.149924	0(0-0)	1	0(0-0)	1	0(0-0)	1	0.431797	0.317311	1
	Micrococcaceae	L6	2.36E-03(1.28E-03-2.80E-03)	0.278392	3.07E-03(2.06E-03-3.45E-03)	0.70309	0(0-0)	0.245401	0(0-0)	0.140826	3.73112e-05	0.354539	0.317311
	Micrococcaceae	L12	2.22E-03(1.09E-03-3.04E-03)	0.278392	1.26E-03(1.20E-03-1.46E-03)	0.70309	0(0-0)	0.245401	0(0-6.05E-05)	0.140826	1.55214e-05	0.907869	0.144127
	Micrococcaceae	L18	1.32E-03(6.91E-04-1.98E-03)	0.278392	2.37E-03(1.61E-03-2.59E-03)	0.70309	0(0-1.62E-04)	0.245401	0(0-0)	0.140826	0.000508849	0.247648	0.142213
	Nocardiaceae	L6	0(0-0)	0.177422	0(0-1.36E-03)	0.144155	0(0-0)	0.391606	0(0-0)	0.107071	0.189899	0.448529	0.317311
	Nocardiaceae	L12	0(0-0)	0.177422	0(0-0)	0.144155	0(0-0)	0.391606	0(0-0)	0.107071	0.289659	0.285049	0.144127
	Nocardiaceae	L18	0(0-4.14E-04)	0.177422	2.84E-03(0-0.02)	0.144155	0(0-0)	0.391606	0(0-6.44E-04)	0.107071	0.0460373	0.103826	0.0619234
	Bifidobacteriaceae	L6	4.42E-03(1.06E-03-0.01)	0.527628	0.08(9.54E-03-0.63)	0.0754974	1.48E-04(0-3.07E-04)	0.902519	0(0-5.87E-05) a	0.00106978	3.58542e-05	0.105193	0.417887
	Bifidobacteriaceae	L12	2.87E-03(1.31E-03-4.76E-03)	0.527628	2.78E-03(9.40E-04-4.01E-03)	0.0754974	0(0-3.32E-04)	0.902519	0(0-0) a	0.00106978	0.000297982	0.816961	0.369825
	Bifidobacteriaceae	L18	1.59E-03(7.66E-04-4.58E-03)	0.527628	0.02(6.07E-03-0.1)	0.0754974	2.80E-04(0-3.85E-04)	0.902519	8.18E-04(6.01E-04-2.15E-03) b	0.00106978	0.000539842	0.0356919	0.012327
	Coriobacteriaceae	L6	0.04(0.03-0.06)	0.762053	0.08(0.05-0.14)	0.536614	0(0-0)	0.63114	0(0-0)	0.0687392	1.34474e-05	0.164915	0.927264
	Coriobacteriaceae	L12	0.05(0.04-0.06)	0.762053	0.04(0.03-0.04)	0.536614	0(0-0)	0.63114	0(0-5.72E-05)	0.0687392	2.06211e-05	0.562834	0.643954
	Coriobacteriaceae	L18	0.05(0.03-0.05)	0.762053	0.05(0.02-0.08)	0.536614	0(0-0)	0.63114	3.79E-04(0-8.06E-04)	0.0687392	3.43458e-05	0.59951	0.0250462
	Bacteroidaceae	L6	5.77(4.5-7.46)ab	0.00435288	3.97(2.28-6.77)	0.618538	18.72(8.35-25.34) ab	0.0121677	3.38(0.07-10.1) $	0.0667168	0.190319	0.487453	0.0274232
	Bacteroidaceae	L12	4.37(2.99-4.51)a	0.00435288	6.35(5.04-10.42)	0.618538	0.11(0.06-3.46)# a	0.0121677	10.75(2.95-26.08)* # $	0.0667168	0.0355318	0.105193	0.0157143
	Bacteroidaceae	L18	10.09(8.24-10.94)b	0.00435288	5.99(4.61-12.1)	0.618538	0.07(0.05-4.93)# b	0.0121677	0.19(0.11-2.34)#	0.0667168	0.00679219	0.141482	0.749394
	Porphyromonadaceae	L6	12.45(12.18-15.71)	0.774279	9.32(8-9.63)$	0.0626139	43.49(31.76-50)#	0.864525	51.18(43.92-57.58)#	0.540691	2.48068e-05	0.0150873	0.141482
	Porphyromonadaceae	L12	16.87(8.52-17.98)	0.774279	24.58(19.02-25.63)	0.0626139	41.9(23.15-57.03)#	0.864525	48.36(35.59-52.28)#	0.540691	0.00257969	0.0640775	0.59951
	Porphyromonadaceae	L18	16.29(11.48-22.04)	0.774279	17.45(7.64-30.06)	0.0626139	36.03(25.01-44.6)#	0.864525	55.29(49.01-66.11)* # $	0.540691	0.00264432	0.916359	0.0350057
	Prevotellaceae	L6	3.79(1.81-6)	0.36738	1.78(1.38-4.69)	0.980397	0.02(8.12E-03-0.07)#	0.954485	4.23E-03(1.48E-03-0.06)#	0.398275	3.91449e-05	0.297621	0.293622
	Prevotellaceae	L12	7.76(4.87-8.95)	0.36738	2.71(1.3-3.72)$	0.980397	0.01(9.58E-03-0.94)#	0.954485	9.16E-03(5.76E-03-0.06)#	0.398275	0.00015037	0.0372425	0.344562
	Prevotellaceae	L18	6.06(4.15-9.14)	0.36738	3.61(1.13-4.94)	0.980397	0.02(9.67E-03-0.02)#	0.954485	0.02(0.01-0.05)#	0.398275	0.000260543	0.172167	0.224799
	Rikenellaceae	L6	0.37(0.34-0.49)	0.158623	0.37(0.28-0.65)	0.927635	0.55(0.06-1.02)#	0.0621176	1.56E-03(2.69E-04-0.02)# $a	0.0177005	0.0235638	0.816961	0.0356919
	Rikenellaceae	L12	0.28(0.17-0.4)	0.158623	0.45(0.18-0.7)	0.927635	2.48E-03(9.07E-04-5.93E-03)#	0.0621176	0.2(0.07-0.4)# $ b	0.0177005	0.00964705	0.487453	0.0274232
	Rikenellaceae	L18	0.54(0.38-0.7)	0.158623	0.39(0.24-0.88)	0.927635	0.66(8.01E-03-1.03)#	0.0621176	3.19E-03(1.28E-03-0.02)# $ ab	0.0177005	0.0157536	0.674424	0.0350057
	Paraprevotellaceae	L6	3.22(1.12-7.2)	0.631642	0.38(0.09-1.3)	0.168624	2.63E-03(1.24E-03-2.94E-03)	0.149389	2.49E-03(1.40E-03-1.58)	0.740473	0.00277063	0.0491408	0.674424
	Paraprevotellaceae	L12	1.59(0.65-3.08)	0.631642	1.18(0.99-8.3)	0.168624	0.01(3.32E-03-1.89)	0.149389	8.85E-03(4.46E-03-1.43)	0.740473	0.0732479	0.728454	0.833635
	Paraprevotellaceae	L18	1.97(1.46-2.35)	0.631642	1(0.4-1.24)	0.168624	5.07E-03(4.45E-03-8.08E-03)	0.149389	0.01(7.44E-03-0.03)	0.740473	6.61667e-05	0.0587074	0.110223
	Bacillaceae	L6	0(0-0)	0.0561787	6.07E-04(2.07E-04-8.63E-04)	0.237565	0(0-3.78E-04)	0.954894	1.53E-04(0-3.32E-04)	0.947196	0.043952	0.0120566	0.816961
	Bacillaceae	L12	0(0-3.51E-04)	0.0561787	0(0-2.52E-04)	0.237565	0(0-5.67E-05)	0.954894	1.55E-04(0-3.96E-04)	0.947196	0.926371	1	0.417887
	Bacillaceae	L18	2.54E-04(1.78E-04-5.47E-04)	0.0561787	3.16E-04(0-4.44E-04)	0.237565	0(0-2.24E-04)	0.954894	0(0-2.22E-04)	0.947196	0.677857	0.915106	0.709684
	Planococcaceae	L6	5.11E-04(2.07E-04-5.95E-04)	0.058857	1.23E-03(2.60E-04-8.55E-03) a	0.00885171	6.25E-04(0-9.05E-04)	0.0540353	0(0-0)# $ a	0.0295127	0.0137982	0.245467	0.0255795
	Planococcaceae	L12	1.38E-04(0-5.03E-04)	0.058857	0(0-0) b	0.00885171	0(0-0)	0.0540353	1.77E-04(0-7.24E-04) ab	0.0295127	0.301622	0.16822	0.201643
	Planococcaceae	L18	1.68E-03(4.98E-04-1.95E-03)	0.058857	1.06E-03(6.24E-04-1.42E-03) a	0.00885171	7.18E-04(4.61E-04-2.18E-03)	0.0540353	1.14E-03(4.44E-04-3.24E-03) b	0.0295127	0.961467	0.792747	0.563579
	Enterococcaceae	L6	2.00E-04(0-7.63E-04)	0.461296	7.70E-04(5.57E-04-1.22E-03)	0.333143	4.70E-04(2.17E-04-1.67E-03)	0.580677	4.90E-05(0-6.07E-04)	0.526705	0.186835	0.131079	0.280888
	Enterococcaceae	L12	5.96E-04(2.35E-04-7.78E-04)	0.461296	5.77E-04(2.65E-04-7.88E-04)	0.333143	1.37E-03(2.35E-04-4.61E-03)	0.580677	1.30E-04(0-5.71E-04)	0.526705	0.262796	0.953816	0.0667792
	Enterococcaceae	L18	1.22E-04(0-3.67E-04)	0.461296	1.38E-03(3.79E-04-1.96E-03)$	0.333143	5.55E-04(1.62E-04-7.25E-04)	0.580677	8.88E-04(0-1.76E-03)	0.526705	0.111447	0.0111092	0.844595
	Lactobacillaceae	L6	0.69(0.56-1.09)	0.077894	1.61(0.39-3.15)	0.515781	0.76(0.23-1.43)	0.582984	0.02(1.90E-03-0.34)# $	0.272405	0.0299588	0.728454	0.0459994
	Lactobacillaceae	L12	2.38(1.4-3.1)	0.077894	0.93(0.76-1.19)$	0.515781	0.27(9.71E-03-1.17)#	0.582984	0.38(1.40E-03-1.24)#	0.272405	0.0379876	0.0150873	0.46225
	Lactobacillaceae	L18	0.67(0.24-2.22)	0.077894	2.11(1.08-2.4)	0.515781	0.23(6.57E-03-2.72)	0.582984	0.36(0.16-1.3)	0.272405	0.481275	0.400814	0.654721
	Leuconostocaceae	L6	1.66E-03(6.31E-04-2.03E-03)	0.15675	4.55E-03(2.32E-03-6.38E-03)	0.0890976	1.00E-03(4.78E-04-1.54E-03)a	0.00313435	2.47E-03(1.02E-03-8.60E-03)	0.807274	0.0665451	0.0640775	0.0742034
	Leuconostocaceae	L12	2.96E-03(1.61E-03-4.38E-03)	0.15675	5.04E-04(3.35E-04-5.30E-04)	0.0890976	4.27E-03(2.53E-03-5.48E-03)b	0.00313435	3.27E-03(1.27E-03-4.74E-03)	0.807274	0.0854311	0.0825793	0.674424
	Leuconostocaceae	L18	6.24E-03(4.39E-03-9.11E-03)	0.15675	0.01(4.16E-03-0.01)	0.0890976	5.81E-03(3.74E-03-0.01)b	0.00313435	3.08E-03(2.47E-03-3.31E-03)	0.807274	0.587001	0.527395	0.224799
	Christensenellaceae	L6	0.04(0.03-0.05)	0.0577905	0.06(0.03-0.11)	0.1094	0(0-0)#	0.998021	0(0-7.99E-05)#	0.107071	0.000121139	1	0.643954
	Christensenellaceae	L12	0.03(0.02-0.03)	0.0577905	4.32E-03(1.03E-03-7.03E-03)$	0.1094	0(0-0)#	0.998021	0(0-0)#	0.107071	2.28355e-05	0.0372425	0.317311
	Christensenellaceae	L18	0.01(0.01-0.02)	0.0577905	0.02(2.53E-03-0.02)	0.1094	0(0-0)#	0.998021	0(0-1.89E-03)#	0.107071	0.000894845	0.752538	0.173697
	Clostridiaceae	L6	0.01(7.96E-03-0.01) a	0.00473086	0.01(3.54E-03-0.02)	0.373129	1.23E-03(2.43E-04-1.93E-03)#	0.506095	2.84E-04(0-5.36E-04)#	0.29668	0.000395809	1	0.135593
	Clostridiaceae	L12	7.74E-03(3.96E-03-0.01) ab	0.00473086	3.39E-03(1.83E-03-4.34E-03)	0.373129	6.26E-04(2.67E-04-1.35E-03)#	0.506095	2.51E-04(0-6.63E-04)#	0.29668	0.00150951	0.562834	0.286422
	Clostridiaceae	L18	2.99E-03(2.59E-03-3.91E-03) b	0.00473086	3.71E-03(1.95E-03-5.22E-03)	0.373129	3.23E-04(1.39E-04-8.18E-04)#	0.506095	7.10E-04(4.26E-04-3.87E-03)#	0.29668	0.0187081	0.874735	0.275319
	Lachnospiraceae	L6	16.47(12.72-24.19)	0.118142	26.23(21.87-27.74)	0.473468	0.04(0.01-0.09)#	0.227724	0.06(0.01-0.09)#	0.0977721	4.69497e-05	0.417887	0.752714
	Lachnospiraceae	L12	27.45(23.67-29.99)	0.118142	17.9(11.74-22.04)	0.473468	0.06(0.04-0.18)#	0.227724	0.02(9.52E-03-0.03)*# $	0.0977721	1.63822e-05	0.105193	0.0117187
	Lachnospiraceae	L18	18.06(12.95-23.57)	0.118142	25.99(14.63-29.28)	0.473468	0.02(0.01-0.04)#	0.227724	0.04(0.03-0.23)* # $	0.0977721	4.51041e-05	0.400814	0.0476454
	Peptococcaceae	L6	0.15(0.04-0.2)	0.551075	0.14(0.1-0.18) ab	0.0417151	1.48E-04(0-3.02E-04)#	0.562329	0(0-7.99E-05)# a	0.000789508	4.36293e-05	0.907869	0.451509
	Peptococcaceae	L12	0.08(0.04-0.09)	0.551075	0.01(3.08E-04-0.02) a	0.0417151	9.06E-04(2.67E-04-1.01E-03)#	0.562329	0(0-0)# $ a	0.000789508	0.000689849	0.246738	0.00777396
	Peptococcaceae	L18	0.06(0.03-0.09)	0.551075	0.22(0.11-0.24) b	0.0417151	3.59E-04(0-4.57E-04)#	0.562329	4.44E-04(3.82E-04-2.76E-03)# b	0.000789508	0.00419117	0.207578	0.275319
	Ruminococcaceae	L6	5(4.28-6.48) a	0.00517972	4.89(3.86-6.29)	0.434036	0.03(6.54E-03-0.06)#	0.965103	4.87E-03(3.52E-03-0.01)#	0.119991	3.56198e-05	0.562834	0.115184
	Ruminococcaceae	L12	3.88(3.64-5.87) ab	0.00517972	2.18(1.8-3.07)	0.434036	0.02(9.49E-03-0.33)#	0.965103	0.02(3.08E-03-0.17)#	0.119991	0.000117285	0.354539	0.59951
	Ruminococcaceae	L18	2.66(2.38-3.09) b	0.00517972	3.78(2-5.13)	0.434036	0.03(0.02-0.04)#	0.965103	0.03(0.02-0.22)#	0.119991	7.16788e-05	0.59951	0.654721
	Acidaminobacteraceae	L6	0(0-0)	1	0(0-0)	0.318907	4.56E-04(0-6.99E-04)	0.800292	0(0-0)	0.196993	0.00667309	1	0.0640775
	Acidaminobacteraceae	L12	0(0-0)	1	0(0-0)	0.318907	0(0-1.13E-04)	0.800292	0(0-6.48E-05)	0.196993	0.262386	0.285049	0.762885
	Acidaminobacteraceae	L18	0(0-0)	1	0(0-0)	0.318907	2.78E-04(0-2.79E-04)	0.800292	0(0-0)	0.196993	0.00222776	1	0.0250462
	Mogibacteriaceae	L6	0.05(0.04-0.06)	0.0911203	0.05(0.03-0.06)	0.121137	8.47E-04(2.44E-04-1.38E-03)#	0.468391	2.51E-04(0-4.03E-04)#	0.621752	3.49066e-05	0.728454	0.109819
	Mogibacteriaceae	L12	0.03(0.02-0.06)	0.0911203	0.02(3.36E-03-0.02)	0.121137	4.27E-04(3.22E-04-4.60E-04)#	0.468391	1.21E-04(0-2.70E-04)#	0.621752	9.69428e-05	0.132464	0.0699544
	Mogibacteriaceae	L18	0.02(0.02-0.02)	0.0911203	0.02(0.01-0.03)	0.121137	0(0-1.79E-04)#	0.468391	3.55E-04(0-1.10E-03)#	0.621752	0.000482833	0.400814	0.945607
	Erysipelotrichaceae	L6	0.21(0.14-0.82)	0.153355	0.65(0.29-1.09)	0.515781	0.01(0-0.13)#	0.498705	5.35E-04(2.20E-04-5.59E-03)#	0.115919	0.000451694	0.297621	0.393769
	Erysipelotrichaceae	L12	0.85(0.49-0.95)	0.153355	0.28(0.22-0.48)	0.515781	2.81E-03(1.93E-03-0.08)#	0.498705	0.01(9.86E-04-0.13)#	0.115919	0.00101935	0.164915	0.833635
	Erysipelotrichaceae	L18	0.37(0.17-0.49)	0.153355	0.97(0.3-1.12)	0.515781	1.08E-03(4.18E-04-0.05)#	0.498705	8.79E-04(3.09E-04-1.89E-03)#	0.115919	0.000165331	0.207578	0.653293
	Bradyrhizobiaceae	L6	4.00E-04(0-5.95E-04) a	0.0428362	6.10E-04(0-1.54E-03)	0.0643659	3.05E-04(0-3.22E-04)	0.145833	0(0-0)$ a	0.028547	0.0666167	0.541903	0.0106564
	Bradyrhizobiaceae	L12	0(0-0) b	0.0428362	0(0-0)	0.0643659	0(0-0)	0.145833	0(0-6.48E-05) a	0.028547	0.317217	1	0.643954
	Bradyrhizobiaceae	L18	1.06E-04(0-5.72E-04) ab	0.0428362	0(0-0)	0.0643659	3.23E-04(1.41E-04-4.03E-04)	0.145833	3.79E-04(0-5.82E-04) b	0.028547	0.437334	0.277435	0.743895
	Phyllobacteriaceae	L6	0(0-0)	1	0(0-6.90E-05)	0.140826	0(0-7.23E-05)	0.348332	0(0-0)	0.0916654	0.246541	0.170904	0.144127
	Phyllobacteriaceae	L12	0(0-0)	1	0(0-0)	0.140826	0(0-0)	0.348332	0(0-0)	0.0916654	1	1	1
	Phyllobacteriaceae	L18	0(0-0)	1	0(0-0)	0.140826	0(0-0)	0.348332	0(0-2.04E-04)	0.0916654	0.199072	1	0.423667
	Rhizobiaceae	L6	0(0-9.99E-05)	0.513601	6.10E-04(0-2.23E-03)	0.0643659	3.13E-04(2.89E-04-7.53E-04)a	0.0106432	0(0-0)$	0.550128	0.0680627	0.315286	0.0116842
	Rhizobiaceae	L12	0(0-0)	0.513601	0(0-0)	0.0643659	0(0-0)b	0.0106432	0(0-2.32E-04)	0.550128	0.308045	0.349575	0.300776
	Rhizobiaceae	L18	0(0-4.37E-04)	0.513601	0(0-0)	0.0643659	0(0-1.40E-04)ab	0.0106432	0(0-4.40E-04)	0.550128	0.82337	0.609523	0.620416
	Rhodospirillaceae	L6	2.55E-04(0-2.75E-04)	0.469962	2.92E-04(0-3.07E-04)	0.361532	2.93E-03(1.41E-03-4.00E-03)#	0.651889	2.88E-04(1.76E-04-6.21E-04)#	0.424154	0.0102739	0.590679	0.0354207
	Rhodospirillaceae	L12	0(0-6.88E-05)	0.469962	0(0-1.25E-04)	0.361532	1.65E-03(2.01E-04-4.17E-03)#	0.651889	1.50E-03(1.14E-03-1.64E-03)#	0.424154	0.00764659	0.408369	1
	Rhodospirillaceae	L18	0(0-2.26E-04)	0.469962	0(0-8.90E-05)	0.361532	1.41E-03(7.75E-04-6.50E-03)#	0.651889	3.79E-04(1.81E-04-1.26E-03)#	0.424154	0.00598027	0.701671	0.222754
	Alcaligenaceae	L6	1.05(0.91-1.32)	0.97584	1.83(0.93-4.41)	0.881299	1.95(1.58-3.18)	0.0453316	3.6(2.97-4)	0.297153	0.0550648	0.417887	0.0928919
	Alcaligenaceae	L12	1.1(0.79-1.68)	0.97584	1.33(0.75-2.2)	0.881299	3.11(1.57-3.31)#	0.0453316	3.12(2.7-3.81)#	0.297153	0.0155272	1	0.752714
	Alcaligenaceae	L18	1.24(0.61-2.37)	0.97584	1.65(0.89-2.82)	0.881299	5.08(3.21-6.86)#	0.0453316	5.27(3.35-5.33)#	0.297153	0.00155145	0.400814	0.749394
	Comamonadaceae	L6	4.00E-04(0-4.55E-04)	0.502442	1.78E-03(0-5.35E-03)a	0.0295896	1.55E-03(8.98E-04-0.01)# a	0.000720958	0(0-9.19E-05)# $ a	0.00626935	0.0194569	0.370028	0.00199208
	Comamonadaceae	L12	1.12E-04(0-3.34E-04)	0.502442	0(0-0)$ b	0.0295896	0(0-0) b	0.000720958	0(0-1.72E-04) a	0.00626935	0.142468	0.0375889	0.441125
	Comamonadaceae	L18	3.38E-04(1.77E-04-1.11E-03)	0.502442	4.15E-04(0-5.03E-04) ab	0.0295896	3.23E-04(1.61E-04-7.00E-04) ab	0.000720958	7.10E-04(4.26E-04-1.23E-03) b	0.00626935	0.50391	0.915042	0.178755
	Oxalobacteraceae	L6	0(0-2.64E-04)	0.202624	6.60E-04(2.29E-04-1.52E-03)	0.211904	6.18E-03(4.23E-03-7.28E-03)#	0.00230787	0.02(0.01-0.03)# $	0.563514	0.000328812	0.0876688	0.0157143
	Oxalobacteraceae	L12	3.51E-04(0-5.35E-04)	0.202624	0(0-2.40E-04)	0.211904	0.02(0.02-0.03)#	0.00230787	0.02(7.95E-03-0.03)#	0.563514	5.48722e-05	0.329114	0.528612
	Oxalobacteraceae	L18	0(0-5.93E-05)	0.202624	5.50E-04(0-7.73E-04)$	0.211904	7.42E-03(6.30E-03-0.01)#	0.00230787	0.01(0.01-0.01)#	0.563514	2.84309e-05	0.0491408	0.14172
	Desulfovibrionaceae	L6	0.64(0.49-0.81)	0.586274	0.78(0.26-1.37)	0.470354	0.62(0.18-0.68)	0.927635	0.12(0.08-0.38)	0.0636555	0.0678296	0.907869	0.141482
	Desulfovibrionaceae	L12	0.76(0.4-1.32)	0.586274	0.72(0.44-1.34)	0.470354	0.47(0.19-0.78)	0.927635	0.49(0.33-0.65)	0.0636555	0.745616	0.907869	0.916359
	Desulfovibrionaceae	L18	1.18(0.5-1.48)	0.586274	1(0.67-1.29)	0.470354	0.63(0.18-0.91)	0.927635	0.31(0.28-0.61)	0.0636555	0.0864304	0.59951	0.749394
	Aeromonadaceae	L6	0(0-0)	1	0(0-0)	0.407985	5.65E-04(2.94E-04-8.46E-04)#	0.0981714	1.35E-03(9.68E-04-1.99E-03)#	0.301861	0.000303481	0.349575	0.115184
	Aeromonadaceae	L12	0(0-0)	1	0(0-0)	0.407985	2.13E-03(1.30E-03-2.30E-03)#	0.0981714	6.70E-04(3.46E-04-1.31E-03)# $	0.301861	6.71562e-06	1	0.0356919
	Aeromonadaceae	L18	0(0-0)	1	0(0-5.97E-05)	0.407985	9.70E-04(5.78E-04-1.99E-03)#	0.0981714	1.33E-03(7.17E-04-1.54E-03)#	0.301861	3.05451e-05	0.144127	0.848006
	Enterobacteriaceae	L6	0.15(0.04-0.27)	0.361439	0.22(0.08-0.45) ab	0.022	10.67(7.12-12.78)#	0.237659	18.6(13.57-22.76)#	0.597301	3.19968e-05	0.203017	0.141482
	Enterobacteriaceae	L12	0.26(0.07-0.39)	0.361439	0.15(0.07-0.19) a	0.022	23.03(18.86-23.71)#	0.237659	15.55(11.31-18.49)#	0.597301	3.83853e-05	0.816961	0.141482
	Enterobacteriaceae	L18	0.2(0.07-0.49)	0.361439	0.73(0.46-0.99) $ b	0.022	14.76(12.28-39.02)#	0.237659	19.75(12.51-19.88)#	0.597301	4.33923e-05	0.0459994	0.848006
	Pasteurellaceae	L6	7.66E-03(6.11E-03-0.01)	0.523548	7.21E-03(5.47E-03-0.03)	0.652578	0(0-0)#	1	0(0-0)#	0.140826	9.1831e-06	0.907869	1
	Pasteurellaceae	L12	6.42E-03(3.48E-03-0.01)	0.523548	9.04E-03(5.06E-03-0.04)	0.652578	0(0-0)#	1	0(0-9.38E-05)#	0.140826	1.46158e-05	0.487453	0.144127
	Pasteurellaceae	L18	0.02(5.64E-03-0.03)	0.523548	0.03(0.02-0.04)	0.652578	0(0-0)#	1	0(0-0)#	0.140826	2.05148e-05	0.344562	1
	Pseudoalteromonadaceae	L6	0(0-0)	1	0(0-0)	0.561519	3.32E-04(2.41E-04-2.86E-03)#	0.963474	0(0-1.84E-04)#	0.307816	0.00280928	1	0.12482
	Pseudoalteromonadaceae	L12	0(0-0)	1	0(0-0)	0.561519	7.14E-04(0-7.61E-03)#	0.963474	2.70E-04(0-3.21E-04)#	0.307816	0.0185574	0.285049	0.257532
	Pseudoalteromonadaceae	L18	0(0-0)	1	0(0-0)	0.561519	2.82E-04(0-0.01)#	0.963474	3.79E-04(1.81E-04-8.38E-04)#	0.307816	0.00824367	0.317311	0.947903
	Vibrionaceae	L6	0(0-0)	0.358229	3.09E-04(0-3.85E-04)$	0.546787	0.03(7.89E-03-0.04)# a	0.0136839	0.1(0.05-0.14)#	0.0512181	1.32721e-05	0.0158912	0.0587074
	Vibrionaceae	L12	0(0-1.67E-04)	0.358229	0(0-1.26E-04)	0.546787	0.1(0.08-0.12)# b	0.0136839	0.05(0.02-0.11)#	0.0512181	2.10314e-05	0.881931	0.0928919
	Vibrionaceae	L18	0(0-5.93E-05)	0.358229	1.19E-04(0-3.23E-04)	0.546787	0.01(8.05E-03-0.03)# a	0.0136839	0.02(6.85E-03-0.04)#	0.0512181	4.21732e-05	0.184358	0.94906
	Xanthomonadaceae	L6	0(0-0)	0.391606	1.13E-04(0-8.72E-04)$ a	0.0136641	2.85E-04(0-7.61E-04)#	0.112493	0(0-0)#$	1	0.0102708	0.0375889	0.0106564
	Xanthomonadaceae	L12	0(0-0)	0.391606	0(0-0) b	0.0136641	0(0-0)	0.112493	0(0-0)	1	0.411302	1	0.317311
	Xanthomonadaceae	L18	0(0-0)	0.391606	0(0-0) b	0.0136641	0(0-1.40E-04)	0.112493	0(0-0)	1	0.213532	0.317311	0.142213
	Anaeroplasmataceae	L6	2.64E-04(9.99E-05-4.03E-04)	0.150526	1.27E-04(0-2.61E-04) a	0.0137371	0.48(2.22E-04-1)	0.163823	0.05(0-0.13)	0.533005	0.158564	0.473289	0.455545
	Anaeroplasmataceae	L12	1.21E-04(0-2.88E-04)	0.150526	6.16E-04(1.44E-04-8.12E-04) ab	0.0137371	4.52E-03(2.20E-03-2.07)	0.163823	0.07(5.48E-04-0.13)#	0.533005	0.00596941	0.188593	0.674424
	Anaeroplasmataceae	L18	5.75E-04(4.22E-04-7.15E-04)	0.150526	1.59E-03(9.55E-04-4.40E-03) b	0.0137371	3.23E-04(2.79E-04-6.09E-04)	0.163823	0.3(0.01-0.33)#	0.533005	0.0362132	0.141482	0.0733216
	Verrucomicrobiaceae	L6	1.92(1.33-2.2)	0.722443	1.23(0.69-1.74)	0.974137	1.97(0.44-3.94)	0.582984	2.96(1.61-4.16)	0.542584	0.282319	0.24716	0.344562
	Verrucomicrobiaceae	L12	1.63(0.73-2.58)	0.722443	0.95(0.71-1.12)	0.974137	0.54(0.01-2.4)	0.582984	3(0.35-6.35)	0.542584	0.549539	0.24716	0.344562
	Verrucomicrobiaceae	L18	1.13(0.94-1.59)	0.722443	1.02(0.52-2.07)	0.974137	0.02(6.52E-03-5.44)	0.582984	0.02(0.01-5.52)	0.542584	0.571929	0.528612	0.848006
	Genus
	Other	L6	0.02(6.17E-03-0.02)	0.292404	0.02(7.49E-03-0.03)	0.0196298	1.50E-04(0-3.28E-04)#	0.0388084	0(0-1.50E-04)#	0.0809286	3.57743e-05	0.562834	0.487453
		L12	0.01(4.73E-03-0.01)	0.292404	7.05E-03(2.48E-03-0.01)	0.0196298	1.34E-04(0-4.43E-04)#	0.0388084	1.14E-04(0-3.59E-04)#	0.0809286	4.83835e-05	0.203017	0.82248
		L18	5.88E-03(5.23E-03-7.41E-03)	0.292404	2.96E-03(2.26E-03-3.79E-03)$	0.0196298	1.08E-03(7.63E-04-2.99E-03)	0.0388084	2.22E-03(3.55E-04-7.56E-03)	0.0809286	0.0605123	0.0117187	0.563579
	Corynebacterium	L6	0(0-0)	0.195558	2.69E-04(0-6.49E-04)	0.933673	0(0-0)#	1	0(0-0)#	0.63114	0.0199835	0.0896481	0.317311
	Corynebacterium	L12	0(0-2.53E-04)	0.195558	4.52E-04(0-5.02E-04)	0.933673	0(0-0)#	1	0(0-0)#	0.63114	0.0392362	0.346484	0.317311
	Corynebacterium	L18	3.35E-04(0-5.55E-04)	0.195558	1.44E-04(0-5.98E-04)	0.933673	0(0-0)#	1	0(0-0)#	0.63114	0.0142161	0.826444	1
	Rothia	L6	1.24E-03(8.24E-04-1.38E-03)	0.0502878	1.76E-03(1.11E-03-2.42E-03)	0.641759	0(0-0)#	1	0(0-0)#	0.391606	2.3331e-05	0.297621	1
	Rothia	L12	8.67E-04(6.94E-04-1.07E-03)	0.0502878	5.73E-04(5.02E-04-2.41E-03)	0.641759	0(0-0)#	1	0(0-0)#	0.391606	1.52958e-05	0.907869	0.317311
	Rothia	L18	3.72E-04(1.90E-04-5.75E-04)	0.0502878	1.42E-03(8.95E-04-1.61E-03)	0.641759	0(0-0)#	1	0(0-0)#	0.391606	0.000749153	0.0568538	1
	Rhodococcus	L6	0(0-2.07E-04)	0.177422	0(0-1.36E-03)	0.144155	0(0-0)	0.391606	0(0-0)	0.107071	0.189899	0.448529	0.317311
	Rhodococcus	L12	0(0-0)	0.177422	0(0-0)	0.144155	0(0-0)	0.391606	0(0-8.87E-05)	0.107071	0.289659	0.285049	0.144127
	Rhodococcus	L18	0(0-4.14E-04)	0.177422	2.84E-03(0-0.05)	0.144155	0(0-0)	0.391606	0(0-6.44E-04)#	0.107071	0.0460373	0.103826	0.0619234
	Bifidobacterium	L6	4.42E-03(1.06E-03-0.04)	0.527628	0.08(9.54E-03-0.63)	0.112383	1.48E-04(0-3.10E-04)#	0.902519	0(0-2.06E-04)# a	0.00106978	3.58542e-05	0.179712	0.417887
	Bifidobacterium	L12	2.87E-03(1.31E-03-6.06E-03)	0.527628	2.78E-03(9.40E-04-0.01)	0.112383	0(0-3.32E-04)#	0.902519	0(0-0)# a	0.00106978	0.000297982	0.816961	0.369825
	Bifidobacterium	L18	1.59E-03(7.66E-04-4.58E-03)	0.527628	0.02(6.07E-03-0.29) $	0.112383	2.80E-04(0-3.85E-04)#	0.902519	8.18E-04(6.01E-04-2.15E-03)$ b	0.00106978	0.000539842	0.0356919	0.012327
	Enterococcus	L6	0(0-1.47E-04)	0.0595436	1.27E-04(0-2.88E-04)	0.454939	0(0-0)	1	0(0-0)#	1	0.0401537	0.601508	1
	Enterococcus	L12	0(0-0)	0.0595436	0(0-9.54E-05)	0.454939	0(0-0)	1	0(0-0)	1	0.234154	0.562549	1
	Enterococcus	L18	2.60E-04(1.62E-04-4.82E-04)	0.0595436	0(0-7.22E-05)	0.454939	0(0-0)#	1	0(0-0)	1	0.00381204	0.0924391	1
	Bacteroides	L6	5.77(4.5-10.79) a	0.00435288	3.97(2.28-13.54)	0.618538	18.72(8.35-25.34) a	0.0121677	3.38(0.07-10.1)$	0.0667168	0.190319	0.487453	0.0274232
	Bacteroides	L12	4.37(2.99-4.66) a	0.00435288	6.35(5.04-10.42)	0.618538	0.11(0.06-3.46)# b	0.0121677	10.75(2.95-26.08)* # $	0.0667168	0.0355318	0.105193	0.0157143
	Bacteroides	L18	10.09(8.24-13.38) b	0.00435288	5.99(4.61-12.1)	0.618538	0.07(0.05-4.95)# b	0.0121677	0.19(0.11-2.34)#	0.0667168	0.00679219	0.141482	0.749394
	Parabacteroides	L6	12.45(12.17-15.71)	0.774279	9.32(7.99-10.01) $	0.0626139	43.46(31.73-49.99)#	0.864525	51.15(43.9-57.57)#	0.540691	2.48068e-05	0.0150873	0.141482
	Parabacteroides	L12	16.87(8.52-19.54)	0.774279	24.58(19.02-25.63)	0.0626139	41.89(23.12-57.02)#	0.864525	48.36(35.57-52.27)#	0.540691	0.00257969	0.0640775	0.59951
	Parabacteroides	L18	16.29(11.48-22.04)	0.774279	17.45(7.64-30.05)	0.0626139	36.03(25.01-50.82)#	0.864525	55.29(49.01-66.11)# $	0.540691	0.00264432	0.916359	0.0350057
	Porphyromonas	L6	9.95E-04(2.07E-04-1.67E-03)	0.0615374	1.01E-04(0-2.48E-04)	0.133507	9.43E-04(2.41E-04-0.02)#	0.400075	0.01(7.13E-03-0.02)# a	0.00889238	0.0370367	0.151494	0.598432
	Porphyromonas	L12	7.45E-04(0-1.22E-03)	0.0615374	1.39E-03(2.80E-04-1.59E-03)	0.133507	2.40E-04(0-0.02)	0.400075	5.03E-03(0-0.01) ab	0.00889238	0.935848	0.682751	0.912701
	Porphyromonas	L18	0(0-5.91E-05)	0.0615374	1.44E-04(0-4.13E-04)	0.133507	0(0-1.47E-03)	0.400075	0(0-0) b	0.00889238	0.152323	0.227518	0.0619234
	Prevotella	L6	2.39(1.44-5.64)	0.446425	1.36(0.7-3.81)	0.980968	0.02(7.18E-03-0.03)#	0.483217	3.46E-03(1.11E-03-0.01)#	0.070772	3.40518e-05	0.297621	0.141482
	Prevotella	L12	5.77(3.39-10.26)	0.446425	1.47(1.06-3.31)	0.980968	0.01(5.77E-03-0.5)$	0.483217	4.55E-03(1.35E-03-8.02E-03)# $	0.070772	8.97053e-05	0.0491408	0.0459994
	Prevotella	L18	5.38(3.48-7.6)	0.446425	2.95(0.85-4.07)	0.980968	9.33E-03(5.77E-03-0.01)#	0.483217	0.01(7.28E-03-0.05)#	0.070772	0.000204725	0.115184	0.14172
	Bacillus	L6	0(0-0) a	0.046	6.07E-04(2.07E-04-6.78E-04)*$	0.308799	0(0-3.78E-04)	0.954894	1.53E-04(0-3.32E-04)#	0.947196	0.0229745	0.00611178	0.816961
	Bacillus	L12	0(0-2.96E-04) a	0.046	0(0-3.65E-04)	0.308799	0(0-2.59E-04)	0.954894	1.55E-04(0-3.96E-04)	0.947196	0.911517	0.896125	0.417887
	Bacillus	L18	2.40E-04(0-3.17E-04) b	0.046	3.16E-04(0-4.44E-04)	0.308799	0(0-2.24E-04)	0.954894	0(0-6.01E-04)	0.947196	0.843443	0.553127	0.709684
	Enterococcus	L6	2.00E-04(0-8.70E-04)	0.461296	7.70E-04(5.57E-04-1.22E-03)	0.333143	4.70E-04(2.17E-04-1.67E-03)	0.580677	4.90E-05(0-6.07E-04)	0.526705	0.186835	0.131079	0.280888
	Enterococcus	L12	5.96E-04(2.35E-04-9.58E-04)	0.461296	5.77E-04(2.65E-04-9.51E-04)	0.333143	1.37E-03(2.35E-04-4.61E-03)	0.580677	1.30E-04(0-5.71E-04)	0.526705	0.262796	0.953816	0.0667792
	Enterococcus	L18	1.22E-04(0-3.67E-04)	0.461296	1.38E-03(3.79E-04-2.38E-03) $	0.333143	5.55E-04(1.62E-04-1.25E-03)	0.580677	8.88E-04(0-2.08E-03)	0.526705	0.111447	0.0111092	0.844595
	Lactobacillus	L6	0.69(0.56-1.51)	0.077894	1.61(0.39-3.15)	0.515781	0.76(0.23-1.43)	0.582984	0.02(1.90E-03-0.34)# $	0.272405	0.0299588	0.728454	0.0459994
	Lactobacillus	L12	2.38(1.4-3.1)	0.077894	0.93(0.76-1.19) $	0.515781	0.27(9.71E-03-1.17)#	0.582984	0.38(1.40E-03-1.24)#	0.272405	0.0379876	0.0150873	0.46225
	Lactobacillus	L18	0.67(0.24-2.22)	0.077894	2.11(1.08-3.24)	0.515781	0.23(6.57E-03-2.72)	0.582984	0.36(0.16-1.3)	0.272405	0.481275	0.400814	0.654721
	Leuconostoc	L6	1.66E-03(6.31E-04-1.88E-03)	0.131847	4.24E-03(2.32E-03-9.53E-03)	0.0890976	1.00E-03(4.03E-04-1.54E-03)a	0.00324101	2.47E-03(1.02E-03-8.60E-03)	0.867046	0.0528675	0.0559775	0.0585217
	Leuconostoc	L12	2.41E-03(1.60E-03-5.68E-03)	0.131847	5.04E-04(3.35E-04-8.43E-04)	0.0890976	4.27E-03(2.53E-03-6.62E-03)b	0.00324101	3.27E-03(1.27E-03-7.62E-03)	0.867046	0.0729191	0.164915	0.674424
	Leuconostoc	L18	5.97E-03(4.27E-03-8.93E-03)	0.131847	0.01(4.16E-03-0.02)	0.0890976	5.81E-03(3.20E-03-0.01)b	0.00324101	2.64E-03(2.29E-03-3.77E-03)	0.867046	0.632658	0.527395	0.337904
	Lactococcus	L6	4.64E-03(2.87E-03-7.34E-03)	0.483217	9.25E-03(5.29E-03-0.02) a	0.0160292	0(0-0)#	0.63114	0(0-0)#	0.561519	8.49511e-06	0.0825793	0.317311
	Lactococcus	L12	6.39E-03(4.51E-03-0.01)	0.483217	2.26E-03(1.22E-03-3.84E-03)$ b	0.0160292	0(0-0)#	0.63114	0(0-0)#	0.561519	1.23643e-05	0.0491408	0.927264
	Lactococcus	L18	0.01(3.04E-03-0.02)	0.483217	0.02(9.68E-03-0.03)a	0.0160292	0(0-0)#	0.63114	0(0-0)#	0.561519	0.000123092	0.674424	0.317311
	Blautia	L6	8.68(6.79-13.54)	0.609599	10.51(6.34-17.38)	0.408373	3.50E-03(6.27E-04-6.28E-03)#	0.0628452	4.99E-03(3.00E-03-0.02)#	0.132682	4.64898e-05	0.816961	0.400814
	Blautia	L12	8(6.99-10.18)	0.609599	5.47(4.66-8.89)	0.408373	0.03(0.01-0.04)#	0.0628452	7.51E-03(3.80E-03-0.01)#	0.132682	2.56316e-05	0.164915	0.0587074
	Blautia	L18	7.48(4.64-10.24)	0.609599	14.39(6.54-16.71)	0.408373	3.95E-03(3.18E-03-6.81E-03)#	0.0628452	0.02(0.01-0.03)$ #	0.132682	2.66373e-05	0.293622	0.00404098
	Butyrivibrio	L6	5.27E-04(4.21E-04-8.56E-04)	0.761035	1.25E-03(1.11E-03-1.71E-03) $	0.0115741	0(0-0)#	1	0(0-0)#	1	2.95279e-06	0.00378224	1
	Butyrivibrio	L12	5.94E-04(3.93E-04-1.73E-03)	0.761035	1.73E-03(1.45E-03-2.50E-03)	0.0115741	0(0-0)#	1	0(0-0)#	1	1.68342e-05	0.0825793	1
	Butyrivibrio	L18	1.03E-03(4.32E-04-1.45E-03)	0.761035	4.32E-04(2.11E-04-7.25E-04)	0.0115741	0(0-0)#	1	0(0-0)#	1	0.000398509	0.291841	1
	Coprococcus	L6	1.17(0.84-2.46)a	0.0395726	3.23(2.48-4.5)$	0.490302	0.02(8.93E-04-0.04)	0.28245	7.23E-03(1.03E-03-8.05E-03)	0.178318	2.65664e-05	0.0491408	0.207578
	Coprococcus	L12	3.06(2.02-4.32)ab	0.0395726	1.94(1.65-4.28)	0.490302	8.53E-03(4.35E-03-0.01)	0.28245	1.19E-03(1.09E-03-2.98E-03)$	0.178318	3.02062e-05	0.816961	0.0459994
	Coprococcus	L18	4.12(2.72-5.43)b	0.0395726	3.13(1.54-4.38)	0.490302	1.94E-03(1.53E-03-3.49E-03)	0.28245	3.27E-03(3.07E-03-0.02)	0.178318	5.29234e-05	0.344562	0.140844
	Ruminococcus	L6	0.74(0.22-1.13)a	0.0251612	0.97(0.65-1.52)	0.229188	3.25E-04(2.17E-04-1.13E-03)# a	0.00453161	2.97E-03(1.36E-03-0.03)#	0.109763	1.81637e-05	0.297621	0.0085537
	Ruminococcus	L12	3.61(1.37-4.21)b	0.0251612	1.02(0.68-1.24)$	0.229188	3.20E-03(1.86E-03-0.04)# b	0.00453161	9.50E-04(5.36E-04-1.91E-03)# $	0.109763	2.13628e-05	0.0372425	0.0157143
	Ruminococcus	L18	0.55(0.35-0.94)ab	0.0251612	0.5(0.3-1.04)	0.229188	1.34E-03(8.62E-04-2.11E-03)#ab	0.00453161	2.22E-03(9.62E-04-6.03E-03)#	0.109763	0.000128373	0.833635	0.565299
	Oscillospira	L6	3.8(2.91-4.67)a	0.0145919	3.35(2.69-3.94)	0.311202	0.02(3.97E-03-0.13)#	0.980968	2.40E-03(2.10E-03-7.23E-03)#	0.133587	3.56198e-05	0.562834	0.115184
	Oscillospira	L12	2.65(2.25-3.22)b	0.0145919	1.61(1.32-4.52)	0.311202	8.42E-03(6.49E-03-0.25)#	0.980968	0.01(2.04E-03-0.16)#	0.133587	0.000314631	0.354539	0.674424
	Oscillospira	L18	2.03(1.8-2.34)b	0.0145919	1.89(1.12-3.67)	0.311202	0.02(0.01-0.02)#	0.980968	0.01(9.62E-03-0.12)#	0.133587	7.48307e-05	0.833635	0.749394
	Allobaculum	L6	0.09(9.14E-03-0.17)a	0.0442649	0.09(3.82E-03-0.15)	0.447798	0(0-0)#	0.294342	0(0-0)#	0.278842	0.000210539	0.953816	0.317311
	Allobaculum	L12	3.16E-03(7.50E-04-0.05)b	0.0442649	0.03(4.33E-04-0.05)	0.447798	0(0-8.11E-05)#	0.294342	1.21E-04(0-2.83E-04)#	0.278842	0.000445456	0.643429	0.469025
	Allobaculum	L18	4.53E-04(2.42E-04-1.04E-03)ab	0.0442649	7.92E-03(3.23E-04-0.11)	0.447798	0(0-1.41E-04)#	0.294342	0(0-0)#	0.278842	0.00929307	0.269796	0.656691
	Coprobacillus	L6	0(0-0.02)a	0.00879363	5.06E-04(2.57E-04-0.03)	0.0283453	0(0-0)#	1	0(0-0)#	0.391606	0.00172291	0.345779	0.317311
	Coprobacillus	L12	0(0-5.31E-05)a	0.00879363	6.16E-04(1.26E-04-1.46E-03)* $	0.0283453	0(0-0)#	1	0(0-0)#	0.391606	0.00159814	0.0238564	1
	Coprobacillus	L18	1.33E-03(4.61E-04-5.60E-03)b	0.00879363	0(0-0)* $	0.0283453	0(0-0)#	1	0(0-0)#	0.391606	2.54879e-05	0.00214272	1
	Sutterella	L6	1.05(0.91-1.46)	0.97584	1.83(0.93-4.41)	0.881299	1.95(1.58-3.18)a	0.0453316	3.6(2.97-4)	0.297153	0.0550648	0.417887	0.0928919
	Sutterella	L12	1.1(0.79-1.68)	0.97584	1.33(0.75-2.2)	0.881299	3.11(1.57-3.84)# b	0.0453316	3.12(2.7-3.81)#	0.297153	0.0155272	1	0.752714
	Sutterella	L18	1.24(0.61-2.37)	0.97584	1.65(0.89-2.82)	0.881299	5.08(3.21-6.86)€ b	0.0453316	5.27(3.35-5.55)#	0.297153	0.00155145	0.400814	0.749394
	Bilophila	L6	3.20E-03(1.51E-03-6.30E-03)	0.20106	6.95E-04(2.07E-04-1.62E-03)	0.321406	8.14E-03(2.09E-03-0.02)	0.0215102	9.60E-03(0-0.11)	0.0991352	0.397628	0.131079	1
	Bilophila	L12	1.29E-03(6.63E-04-2.05E-03)	0.20106	5.77E-04(1.25E-04-2.33E-03)	0.321406	0(0-7.13E-04)#	0.0215102	0.02(0.01-0.03)* # $	0.0991352	0.00651109	0.815335	0.004269
	Bilophila	L18	9.70E-04(2.51E-04-1.74E-03)	0.20106	2.00E-03(1.45E-03-4.54E-03)	0.321406	4.47E-04(0-7.82E-04)#	0.0215102	0.16(0.05-0.28)* # $	0.0991352	0.00036028	0.103308	0.00166458
	Enterobacter	L6	9.99E-04(3.56E-04-1.36E-03)a	0.00901163	1.30E-03(4.51E-04-2.45E-03)a	0.027909	0.18(0.11-0.28)# a	0.00141564	0.24(0.12-0.79)# a	0.00113552	4.46714e-05	0.451509	0.46225
	Enterobacter	L12	7.51E-04(2.57E-04-3.30E-03)a	0.00901163	1.75E-03(9.21E-04-2.40E-03)ab	0.027909	0.68(0.35-0.98)# ab	0.00141564	0.47(0.15-1.02)# a	0.00113552	4.58725e-05	0.417887	0.59951
	Enterobacter	L18	5.85E-03(4.44E-03-8.85E-03)b	0.00901163	0.01(5.77E-03-0.03)b	0.027909	1.93(0.95-3.32)# b	0.00141564	3.02(1.83-4.14)# b	0.00113552	5.74143e-05	0.293622	0.277439
	Erwinia	L6	2.55E-04(0-3.13E-04)	0.309505	0(0-7.63E-05)a	0.0120886	0.02(0.01-0.04)#	0.0673021	0.05(0.03-0.07)#	0.338553	2.36225e-05	0.360765	0.0742034
	Erwinia	L12	2.44E-04(1.66E-04-6.45E-04)	0.309505	0(0-2.20E-04)a	0.0120886	0.07(0.05-0.09)#	0.0673021	0.05(0.04-0.07)#	0.338553	3.6111e-05	0.231998	0.344562
	Erwinia	L18	6.87E-04(1.90E-04-1.79E-03)	0.309505	1.41E-03(6.47E-04-3.19E-03)b	0.0120886	0.04(0.02-0.07)#	0.0673021	0.03(0.02-0.05)#	0.338553	6.49706e-05	0.342782	0.654721
	Klebsiella	L6	4.49E-04(2.79E-04-1.72E-03)	0.751474	1.53E-03(4.14E-04-4.03E-03)a	0.0249832	0.21(0.17-0.23)# a	0.00764399	0.19(0.15-0.45)#	0.0540788	5.24761e-05	0.29589	0.833635
	Klebsiella	L12	1.26E-03(0-6.48E-03)	0.751474	4.52E-04(2.51E-04-1.53E-03)a	0.0249832	0.37(0.31-0.64)# ab	0.00764399	0.25(0.12-0.45)#	0.0540788	4.42125e-05	0.770335	0.344562
	Klebsiella	L18	1.23E-03(5.15E-04-2.46E-03)	0.751474	0.01(4.44E-03-0.03)$ b	0.0249832	0.74(0.58-1.12)# b	0.00764399	0.51(0.4-0.56)#	0.0540788	2.38075e-05	0.00865154	0.179712
	Vibrio	L6	0(0-0)	0.358229	3.09E-04(0-6.10E-04)$	0.546787	0.03(7.82E-03-0.06)#	0.0136839	0.1(0.05-0.14)#	0.0512181	1.32721e-05	0.0158912	0.0587074
	Vibrio	L12	0(0-1.67E-04)	0.358229	0(0-1.26E-04)	0.546787	0.1(0.08-0.15)#	0.0136839	0.05(0.02-0.11)#	0.0512181	2.30422e-05	0.881931	0.141482
	Vibrio	L18	0(0-5.93E-05)	0.358229	1.19E-04(0-7.25E-04)	0.546787	0.01(7.83E-03-0.03)#	0.0136839	0.02(6.85E-03-0.04)#	0.0512181	4.21732e-05	0.184358	0.94906
	Anaeroplasma	L6	2.64E-04(9.99E-05-4.03E-04)	0.150526	1.27E-04(0-3.23E-04)a	0.0137371	0.48(2.22E-04-2.27)	0.163823	0.05(0-0.41)	0.533005	0.158564	0.473289	0.455545
	Anaeroplasma	L12	1.21E-04(0-5.42E-04)	0.150526	6.16E-04(1.44E-04-1.08E-03)ab	0.0137371	4.52E-03(2.20E-03-5.06)#	0.163823	0.07(5.48E-04-0.25)#	0.533005	0.00596941	0.188593	0.674424
	Anaeroplasma	L18	5.75E-04(4.22E-04-1.20E-03)	0.150526	1.59E-03(9.55E-04-4.40E-03)b	0.0137371	3.23E-04(2.79E-04-7.29E-04)#	0.163823	0.3(0.01-1.59)#	0.533005	0.0362132	0.141482	0.0733216
	Akkermansia	L6	1.92(1.33-2.2)	0.722443	1.23(0.69-1.77)	0.974137	1.97(0.44-3.94)	0.582984	2.96(1.61-4.16)	0.542584	0.282319	0.24716	0.344562
	Akkermansia	L12	1.63(0.73-2.58)	0.722443	0.95(0.71-1.37)	0.974137	0.54(0.01-2.4)	0.582984	3(0.35-6.35)	0.542584	0.549539	0.24716	0.344562
	Akkermansia	L18	1.13(0.94-1.59)	0.722443	1.02(0.52-2.07)	0.974137	0.02(6.52E-03-5.44)	0.582984	0.02(0.01-5.52)	0.542584	0.571929	0.528612	0.848006
	1P-value by Kruskal-Wallis test comparing photoperiods in each group. ab letters indicate significant photoperiods differences analyzed by Kruskal-Wallis test followed by Bonferroni p-values adjustment (p<0.016).
	2P-value by Kruskal-Wallis test comparing treatment effect into each group. * and # indicate significant GSPE and ABX effect respectively, analyzed by Kruskal-Wallis test followed by Bonferroni p-values adjustment (p<0.016).
	3P-Value by U-Mann Whitney test to analyze GSPE effect, comparing VH and GSPE-treated rats and ABX and GSPE+ABX-treated rats into each photoperiod. $ indicates significant GSPE effect using U-Mann Whitney test (p<0.05).
	4Data shown as median (firts and third quartile) in percentage of relative abundance (n=7-8)
	Ph:photoperiod condition; L6: 6h light/18h darkness; L12: 12h light/12h darkness; L18: 18h light/6h darkness; CAF: cafeteria diet; GSPE: grape seed proanthocyanidins extract; VH: vehicle; ABX: antibiotic cocktail;
